# Supplementary material for: The global antigenic diversity of swine influenza A viruses
Source: eLife journal article supplement (doi:10.7554/elife.12217), 2016-04-15
Supplement: figures [file elife-12217-figures-v2.pdf]

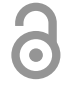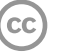

---

## Figures and figure supplements

The global antigenic diversity of swine influenza A viruses

**Nicola S Lewis et al**

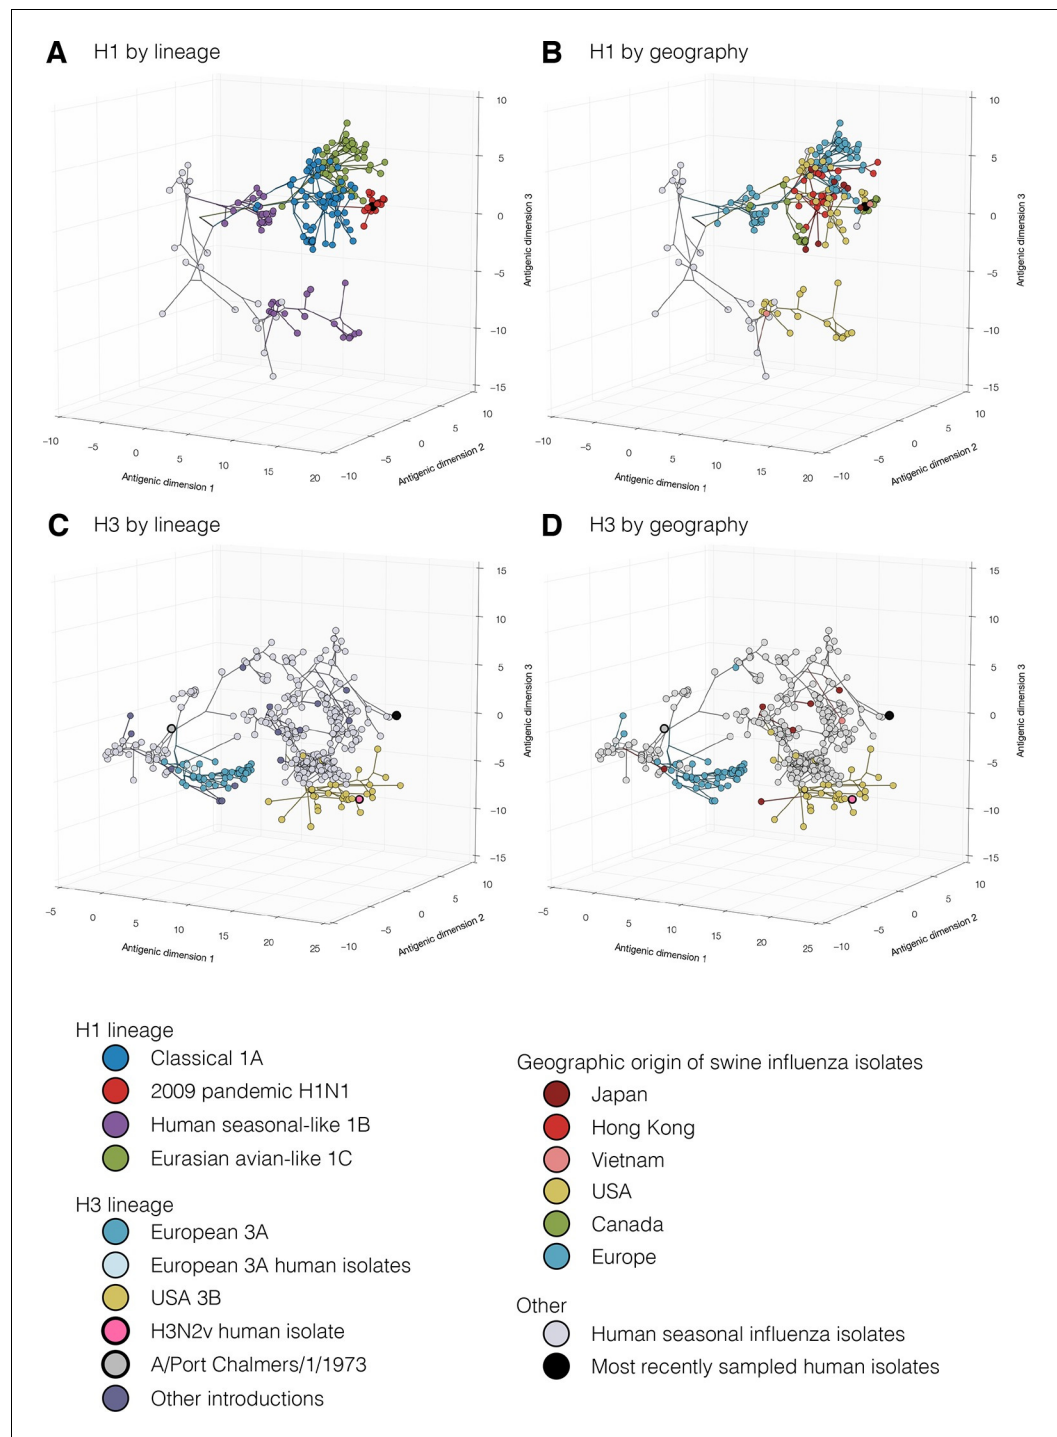

**Figure 1.** Evolutionary relationships of H1 (A, B) and H3 (C, D) influenza viruses circulating in swine and humans inferred by Bayesian Multi-dimensional scaling (BMDS). Each colored ball represents a single virus. Viruses are colored by lineage (A,C) and by geography (B,D). Lines connecting each virus represent inferred phylogenetic relationships. Distances for antigenic dimensions are measured in antigenic units (AU) and each unit is equivalent to a two-fold dilution in HI assay data. Antigenic distance can be interpreted as a measure of antigenic similarity – viruses close to one another are more antigenically similar than viruses further apart. Interactive visualizations are available at <https://phylogeography.github.io/influenzaH1/> and <https://phylogeography.github.io/influenzaH3/>. Source data and GIF files for rotational views of 3D antigenic maps in **Figure 1** have been deposited in Dryad (Lewis et al., 2016).

Figure 1 continued on next page

*Figure 1 continued*

DOI: [10.7554/eLife.12217.003](https://doi.org/10.7554/eLife.12217.003)

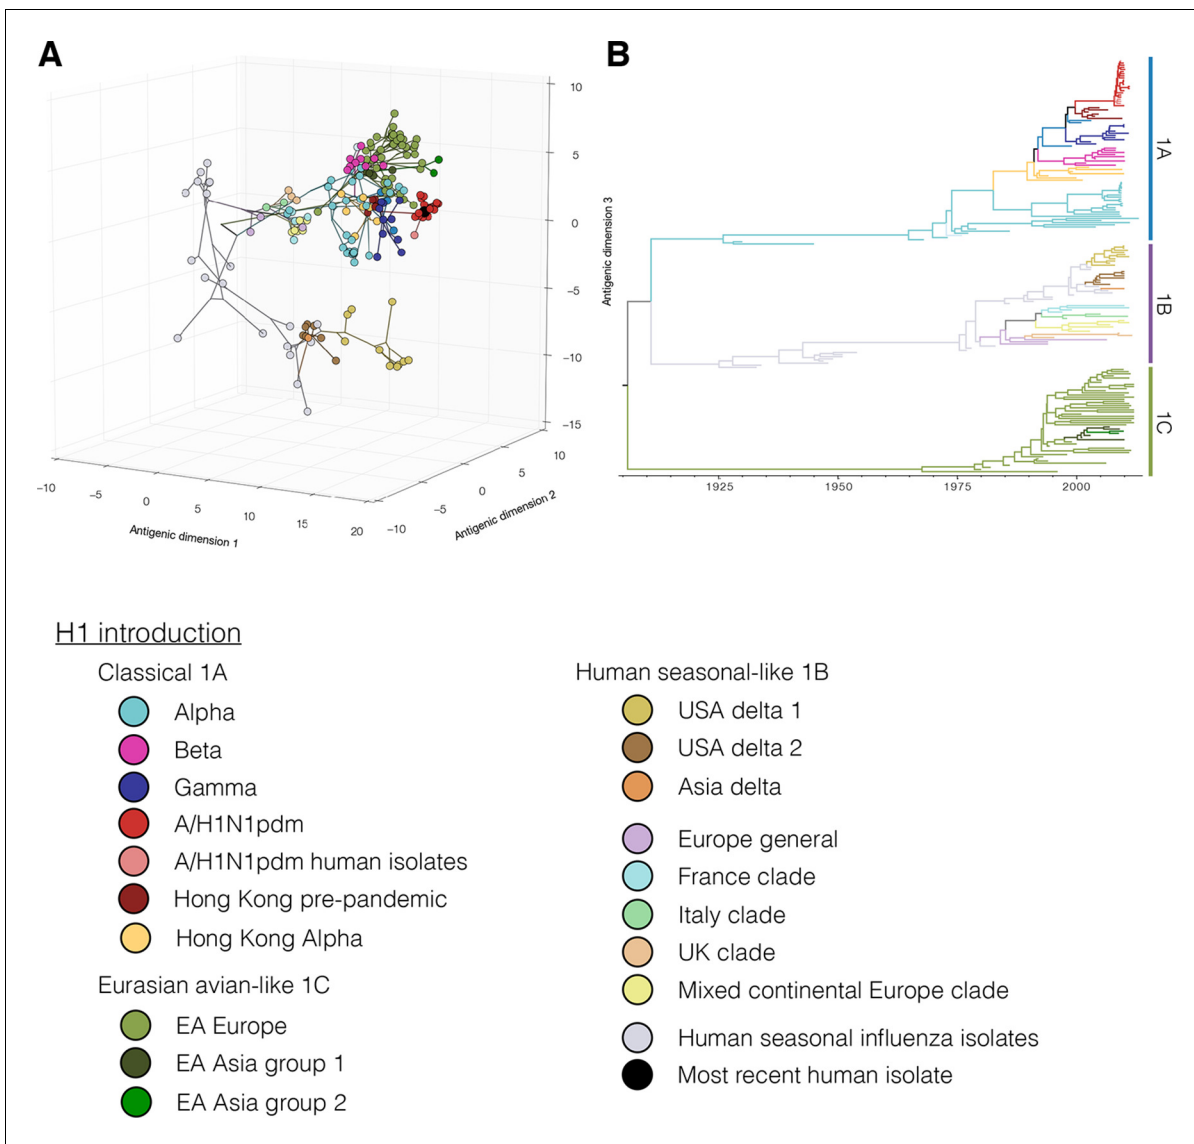

**Figure 1—figure supplement 1.** *Figure 1A,B* colored by H1 genetic sub lineages in the Bayesian MCC tree.

DOI: 10.7554/eLife.12217.004

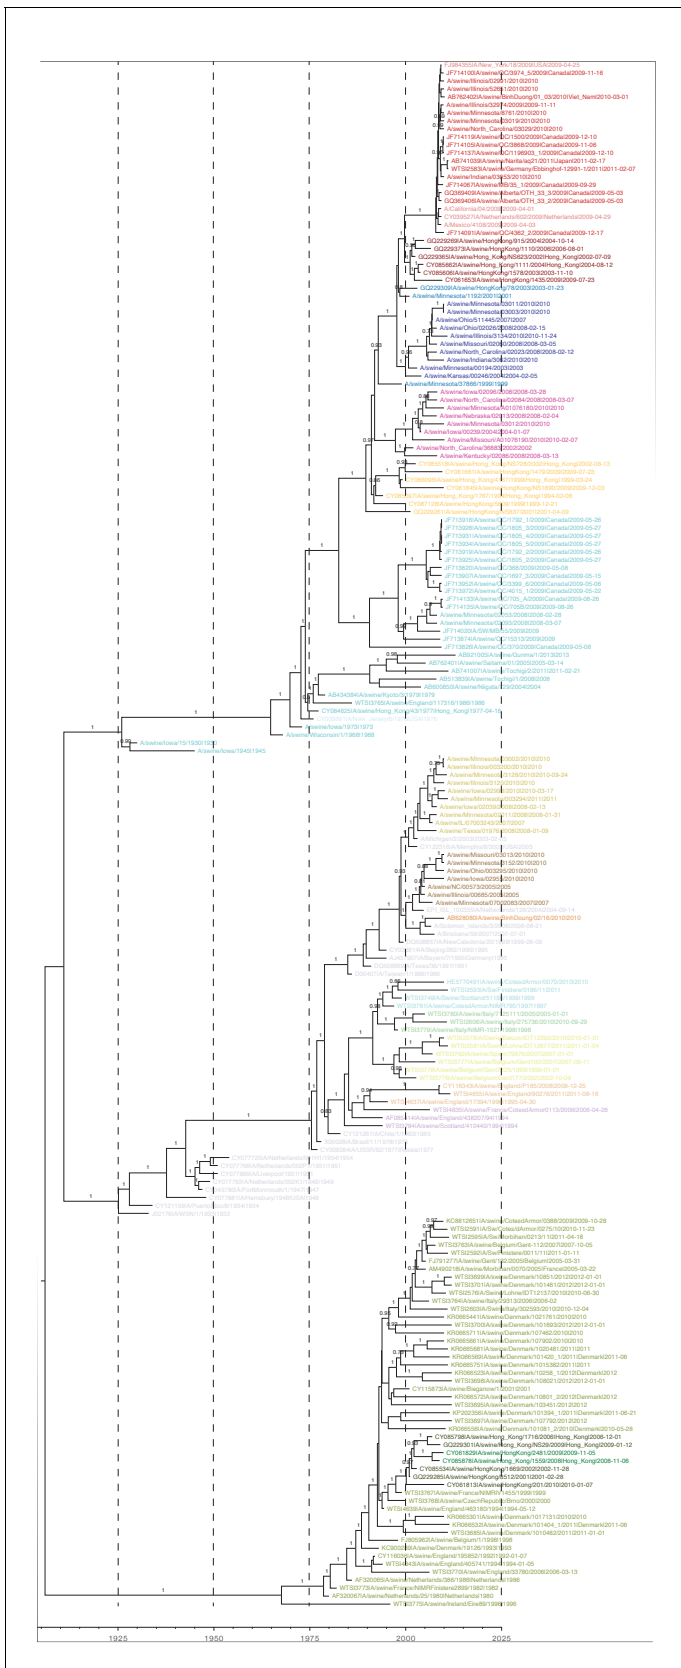

**Figure 1—figure supplement 2.** Bayesian H1 MCC tree with taxa labels and posterior support values  
 DOI: 10.7554/eLife.12217.005

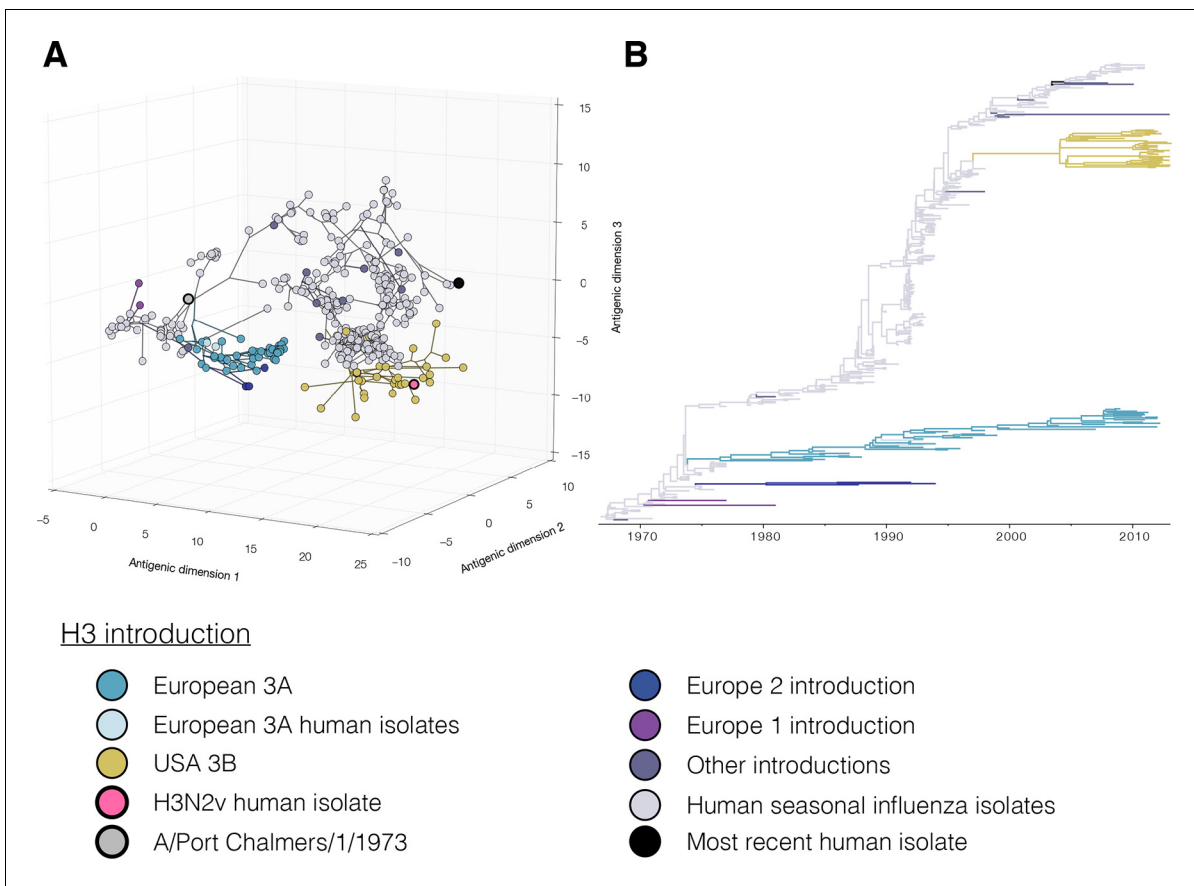

**Figure 1—figure supplement 3.** *Figure 1C,D* colored by H3 genetic sub lineages in the Bayesian MCC tree.

DOI: [10.7554/eLife.12217.006](https://doi.org/10.7554/eLife.12217.006)

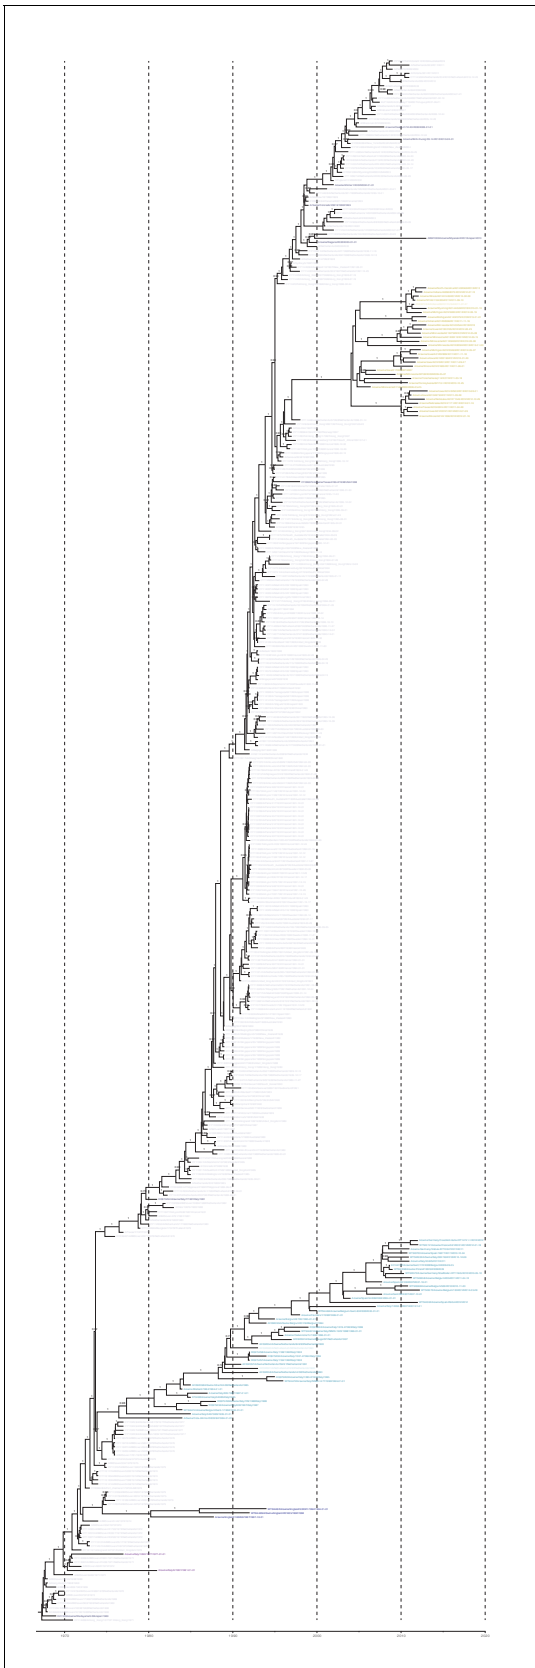

**Figure 1—figure supplement 4.** Bayesian H3 MCC tree with taxa labels and posterior support values

DOI: [10.7554/eLife.12217.007](https://doi.org/10.7554/eLife.12217.007)

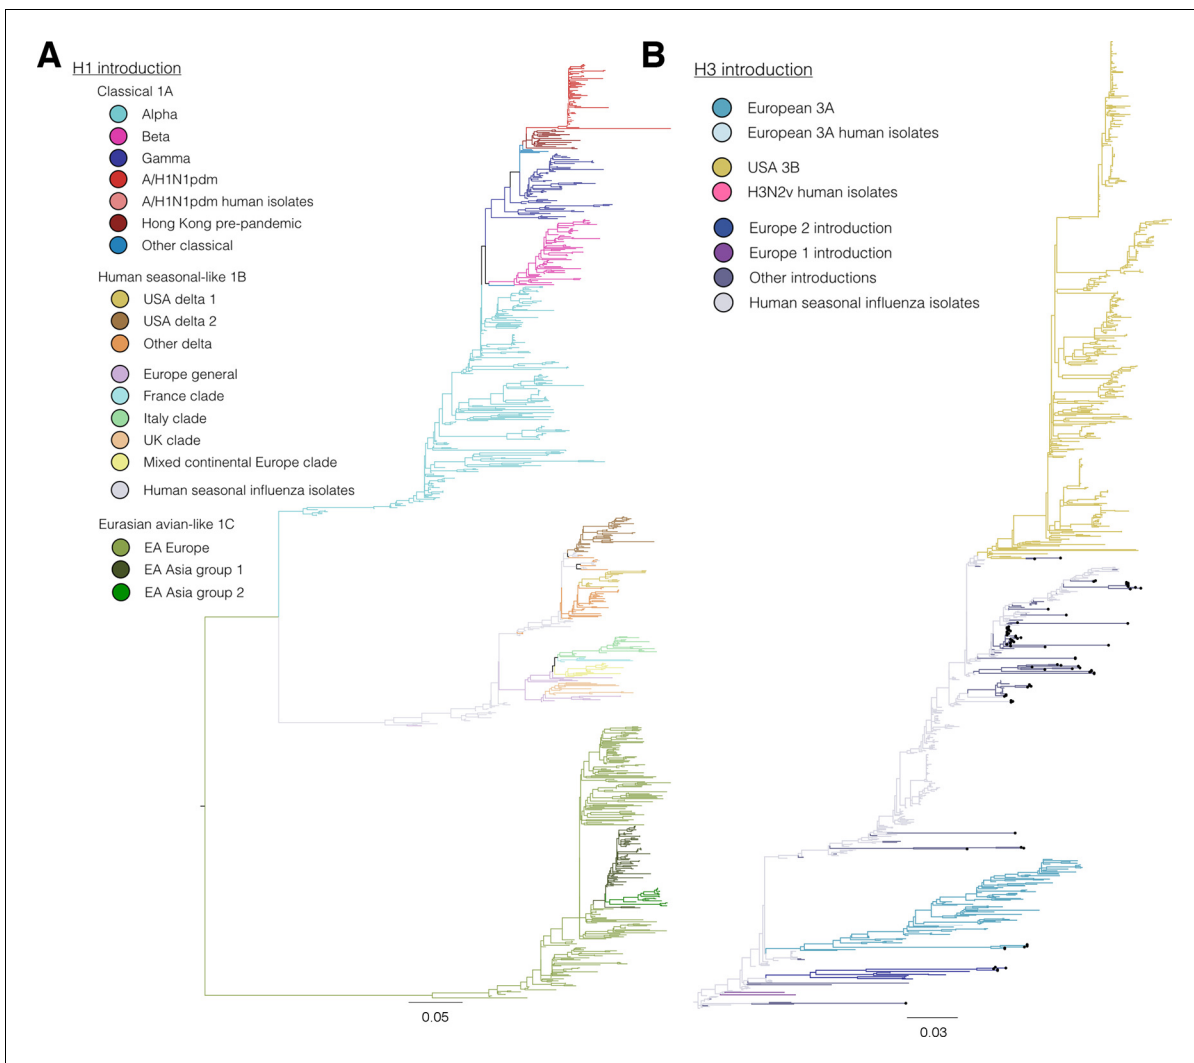

**Figure 1—figure supplement 5.** Maximum likelihood phylogenetic trees colored by lineage.

DOI: [10.7554/eLife.12217.008](https://doi.org/10.7554/eLife.12217.008)



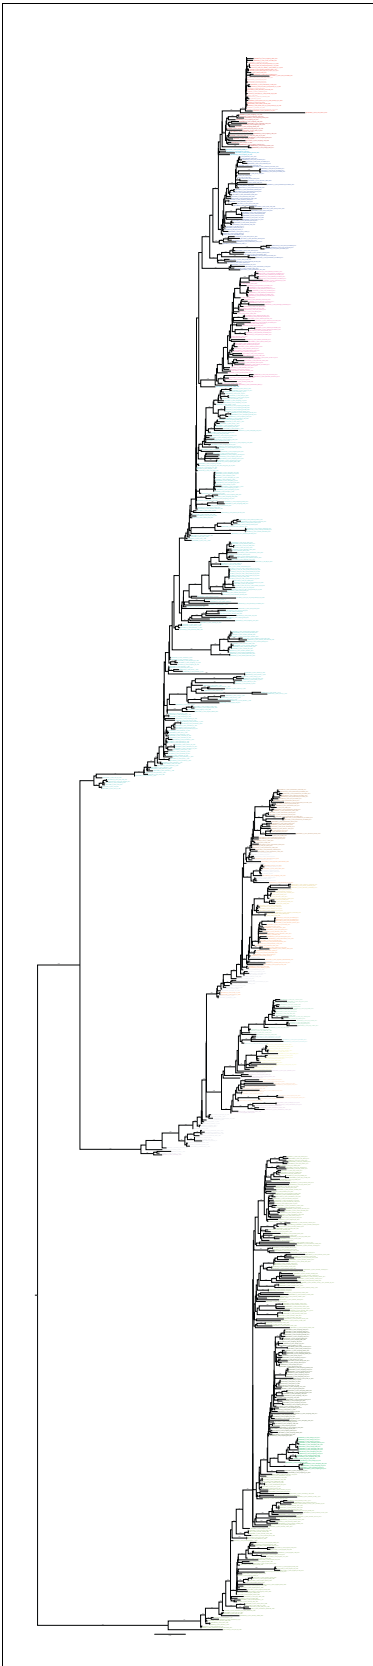

**Figure 1—figure supplement 6.** Maximum likelihood H1 phylogenetic tree with taxa labels and bootstrap support values  
DOI: [10.7554/eLife.12217.009](https://doi.org/10.7554/eLife.12217.009)

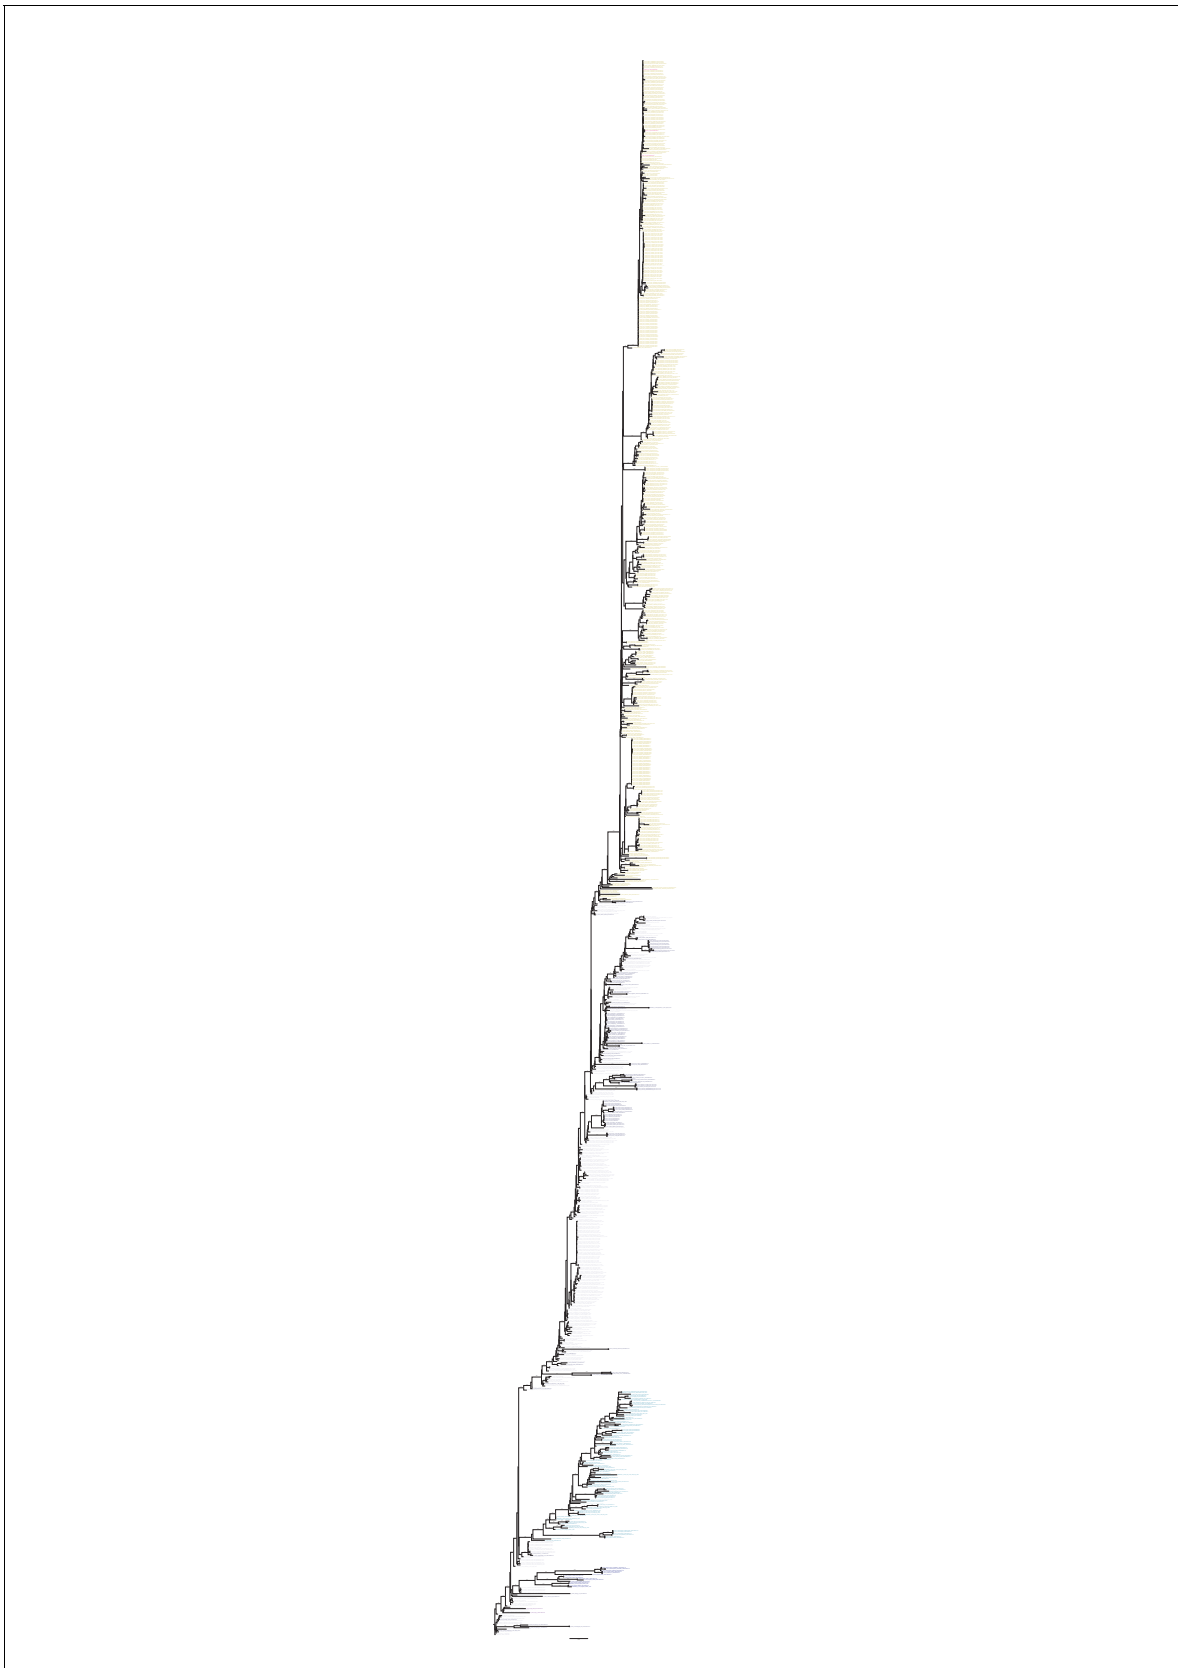

**Figure 1—figure supplement 7.** Maximum likelihood H3 phylogenetic tree with taxa labels and bootstrap support values.  
DOI: [10.7554/eLife.12217.010](https://doi.org/10.7554/eLife.12217.010)

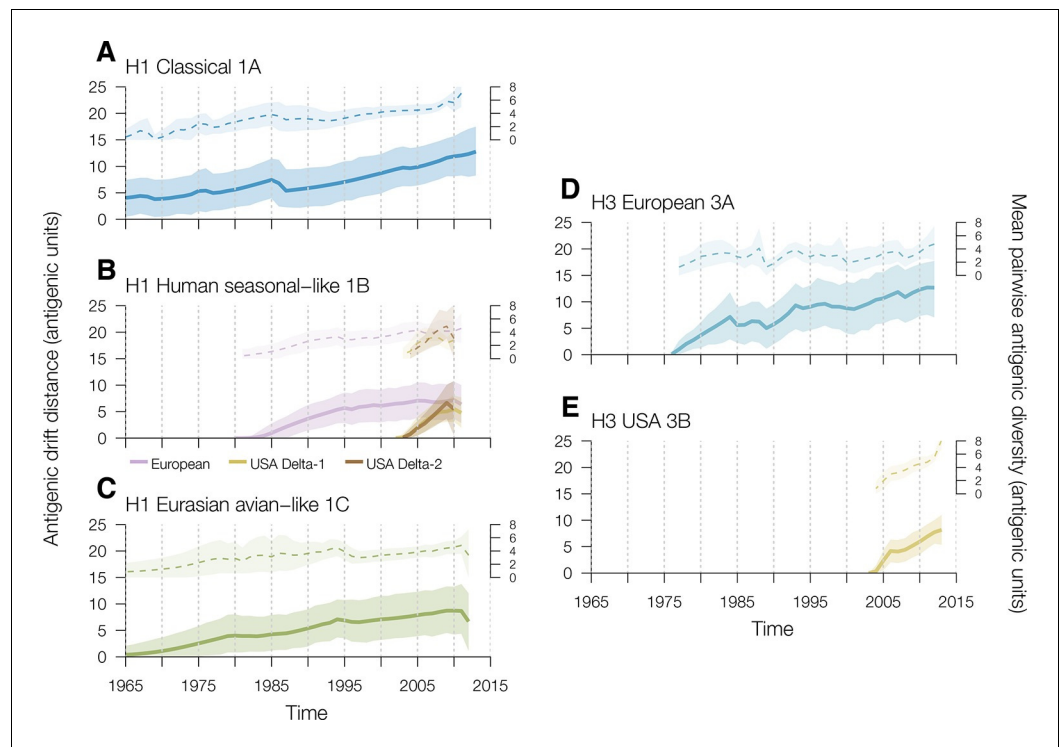

**Figure 2.** Time series of year-to-year rates of antigenic drift distance and antigenic diversity of H1 and H3 viruses in swine by genetic lineage. Solid colored lines represent year-to-year antigenic drift distance, where drift for year  $i$  is measured as the mean of Euclidean distances among strains in a phylogenetic lineage in year  $i$  compared to the mean of Euclidean distances among strains of that phylogenetic lineage from the previous year ( $i-1$ ). The dotted line represents antigenic diversity among H1 and H3 strains by lineage through time. For the solid and dotted lines, the shaded region represents the range of the highest posterior density estimates. Multiple introductions which circulate for >5 years of the human seasonal-like swine H1 lineage in European (purple) and USA (gold) swine were calculated separately. Source data for **Figure 2** has been deposited in Dryad ([Lewis et al., 2016](https://doi.org/10.7554/eLife.12217)). DOI: [10.7554/eLife.12217.011](https://doi.org/10.7554/eLife.12217.011)
